# Supplementary material for: Efficient synthesis of 5-hydroxymethylfurfural by MCM-41 modified with multiple acid sites
Source: Royal Society of Chemistry journal article supplement (doi:10.1039/d3se00059a), 2023-01-01
Supplement: d3se00059a1.pdf [file d3se00059a1.pdf]

# **Supporting Information: Efficient synthesis of 5-hydroxymethylfurfural by modified MCM-41 with multiple acid sites**

Xiaofan Zhu, Qiqi Liang, Yan Fu, and Jie Chang\*

School of Chemistry and Chemical Engineering, South China University of Technology, Tianhe, Guangzhou 510640 , China.

\*Corresponding Author: Prof. Jie Chang.

Tel/Fax: +86 20 87112448. E-mail: changjie@scut.edu.cn

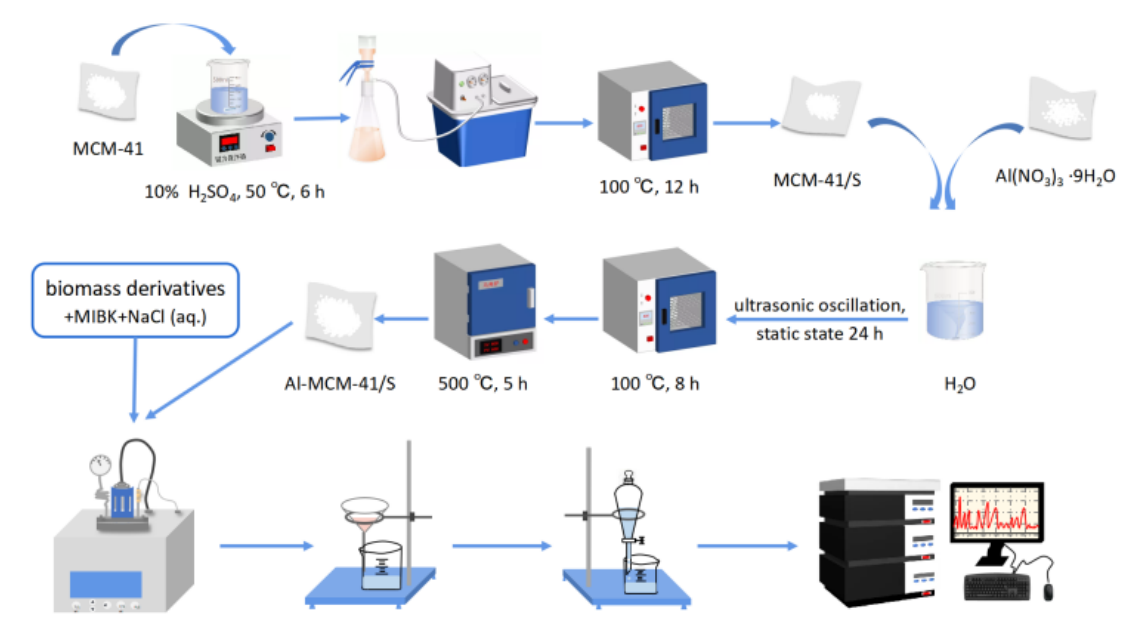

**Figure S1.** Catalysts preparation and reaction procedure of this research.

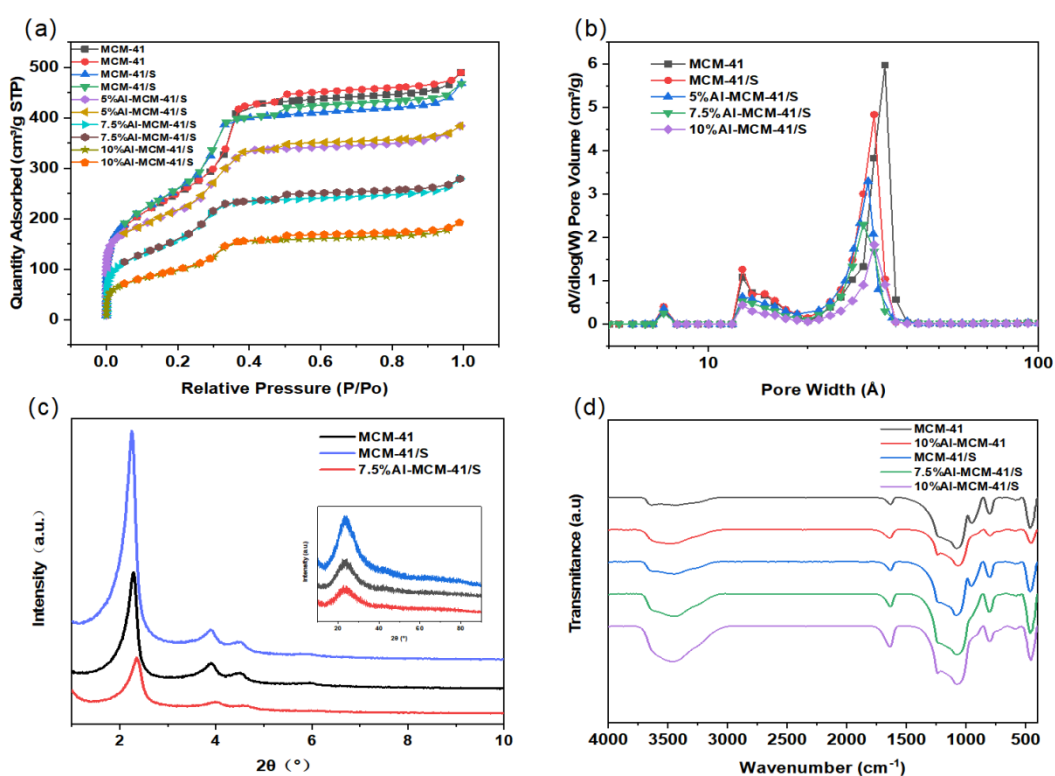

**Figure S2.** (a) N<sub>2</sub> adsorption-desorption isotherms. (b) Pore size distributions curves. (c) XRD patterns at different angle. (d) FT-IR spectra of samples.

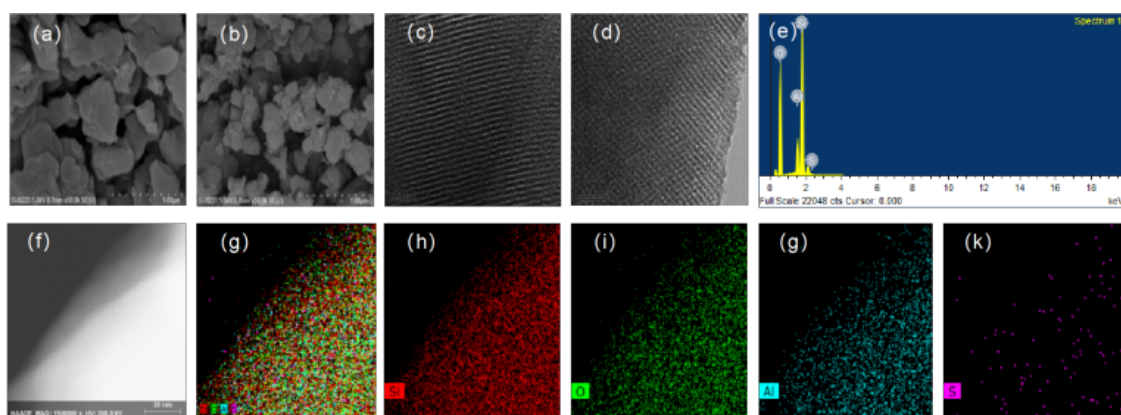

**Figure S3.** (a) SEM of MCM-41. (b) SEM of 7.5%Al-MCM-41/S. (c) TEM of MCM-41. (d) TEM of 7.5%Al-MCM-41/S. (e) SEM-EDS of 7.5%Al-MCM-41/S. (f-k) The elemental mapping images.

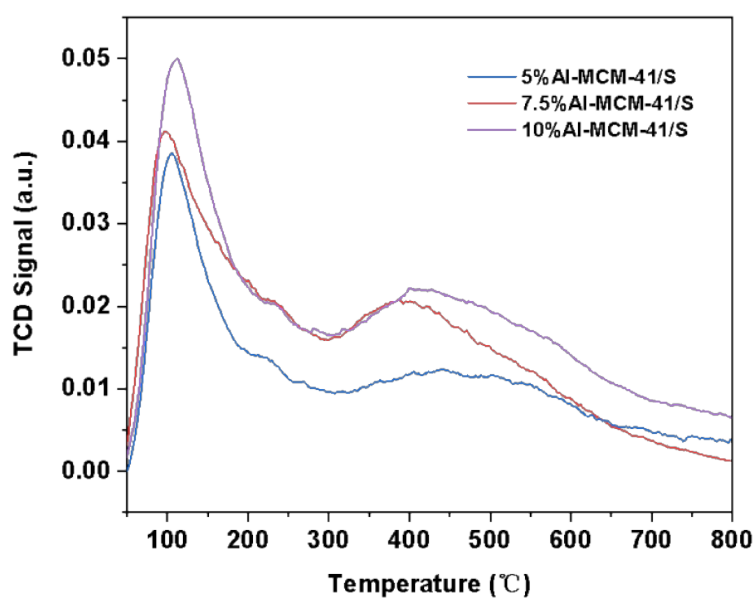

**Figure S4.** NH<sub>3</sub>-TPD profiles of different samples.

**Figure S5.** Effect of temperature (0.075 g 7.5%Al-MCM-41/S(left), 0.075 g 7.5%Al-MCM-41(right), 0.1 g glucose, 1 h, 5 mL 20 % NaCl (aq.), 20 mL MIBK).

**Figure S6.** Effects of reaction temperature and time on HMF yield (0.075 g catalysts, 0.1 g glucose, 5 mL 20 % NaCl (aq.), 20 mL MIBK).

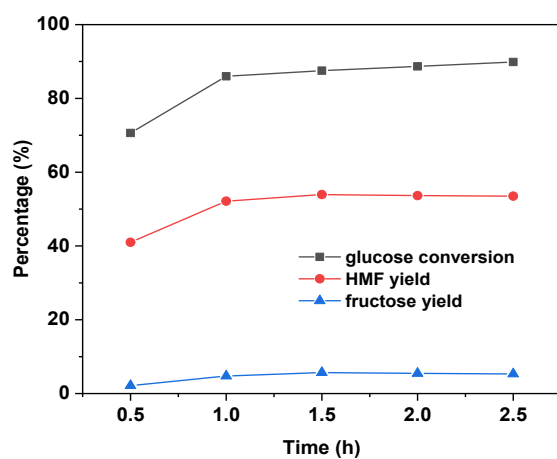

**Figure S7.** Effect of reaction time (0.075 g 7.5%Al-MCM-41, 0.1 g glucose, 190 °C, 5 mL 20 % NaCl (aq.), 20 mL MIBK).
